# Supplementary material for: Brainstem–cortex disconnection in amyotrophic lateral sclerosis: bulbar impairment, genotype associations, asymptomatic changes and biomarker opportunities
Source: Springer Nature journal article supplement (doi:10.1007/s00415-023-11682-6), 2023-04-06
Supplement: MOESM1 [file 25215586]

**Title:** Brainstem-cortex disconnection in amyotrophic lateral sclerosis: genotype associations, asymptomatic changes and biomarker opportunities

### STROBE statement

The presented pilot observational study complies with the STROBE statement guidelines. The requirements of all Items (1-22) on the bellow STROBE checklist were met.

|                              | <b>Item No</b> | <b>Recommendation</b>                                                                                                                                                                                                                                                                                                                               |
|------------------------------|----------------|-----------------------------------------------------------------------------------------------------------------------------------------------------------------------------------------------------------------------------------------------------------------------------------------------------------------------------------------------------|
| <b>Title and abstract</b>    | 1 ✓            | (a) Indicate the study's design with a commonly used term in the title or the abstract<br><br>(b) Provide in the abstract an informative and balanced summary of what was done and what was found                                                                                                                                                   |
| <b>Introduction</b>          |                |                                                                                                                                                                                                                                                                                                                                                     |
| Background/rationale         | 2 ✓            | Explain the scientific background and rationale for the investigation being reported                                                                                                                                                                                                                                                                |
| Objectives                   | 3 ✓            | State specific objectives, including any prespecified hypotheses                                                                                                                                                                                                                                                                                    |
| <b>Methods</b>               |                |                                                                                                                                                                                                                                                                                                                                                     |
| Study design                 | 4 ✓            | Present key elements of study design early in the paper                                                                                                                                                                                                                                                                                             |
| Setting                      | 5 ✓            | Describe the setting, locations, and relevant dates, including periods of recruitment, exposure, follow-up, and data collection                                                                                                                                                                                                                     |
| Participants                 | 6 ✓            | (a) Give the eligibility criteria, and the sources and methods of case ascertainment and control selection. Give the rationale for the choice of cases and controls<br><br>(b) For matched studies, give matching criteria and the number of controls per case                                                                                      |
| Variables                    | 7 ✓            | Clearly define all outcomes, exposures, predictors, potential confounders, and effect modifiers. Give diagnostic criteria, if applicable                                                                                                                                                                                                            |
| Data sources/<br>measurement | 8* ✓           | For each variable of interest, give sources of data and details of methods of assessment (measurement). Describe comparability of assessment methods if there is more than one group                                                                                                                                                                |
| Bias                         | 9 ✓            | Describe any efforts to address potential sources of bias                                                                                                                                                                                                                                                                                           |
| Study size                   | 10 ✓           | Explain how the study size was arrived at                                                                                                                                                                                                                                                                                                           |
| Quantitative<br>variables    | 11 ✓           | Explain how quantitative variables were handled in the analyses. If applicable, describe which groupings were chosen and why                                                                                                                                                                                                                        |
| Statistical methods          | 12 ✓           | (a) Describe all statistical methods, including those used to control for confounding<br><br>(b) Describe any methods used to examine subgroups and interactions<br><br>(c) Explain how missing data were addressed<br><br>(d) If applicable, explain how matching of cases and controls was addressed<br><br>(e) Describe any sensitivity analyses |
| <b>Results</b>               |                |                                                                                                                                                                                                                                                                                                                                                     |
| Participants                 | 13* ✓          | (a) Report numbers of individuals at each stage of study—eg numbers                                                                                                                                                                                                                                                                                 |

|                          |       |                                                                                                                                                                                                              |
|--------------------------|-------|--------------------------------------------------------------------------------------------------------------------------------------------------------------------------------------------------------------|
|                          |       | potentially eligible, examined for eligibility, confirmed eligible, included in the study, completing follow-up, and analysed                                                                                |
|                          |       | (b) Give reasons for non-participation at each stage                                                                                                                                                         |
|                          |       | (c) Consider use of a flow diagram                                                                                                                                                                           |
| Descriptive data         | 14* ✓ | (a) Give characteristics of study participants (eg demographic, clinical, social) and information on exposures and potential confounders                                                                     |
|                          |       | (b) Indicate number of participants with missing data for each variable of interest                                                                                                                          |
| Outcome data             | 15* ✓ | Report numbers in each exposure category, or summary measures of exposure                                                                                                                                    |
| Main results             | 16 ✓  | (a) Give unadjusted estimates and, if applicable, confounder-adjusted estimates and their precision (eg, 95% confidence interval). Make clear which confounders were adjusted for and why they were included |
|                          |       | (b) Report category boundaries when continuous variables were categorized                                                                                                                                    |
|                          |       | (c) If relevant, consider translating estimates of relative risk into absolute risk for a meaningful time period                                                                                             |
| Other analyses           | 17 ✓  | Report other analyses done—eg analyses of subgroups and interactions, and sensitivity analyses                                                                                                               |
| <b>Discussion</b>        |       |                                                                                                                                                                                                              |
| Key results              | 18 ✓  | Summarise key results with reference to study objectives                                                                                                                                                     |
| Limitations              | 19 ✓  | Discuss limitations of the study, taking into account sources of potential bias or imprecision. Discuss both direction and magnitude of any potential bias                                                   |
| Interpretation           | 20 ✓  | Give a cautious overall interpretation of results considering objectives, limitations, multiplicity of analyses, results from similar studies, and other relevant evidence                                   |
| Generalisability         | 21 ✓  | Discuss the generalisability (external validity) of the study results                                                                                                                                        |
| <b>Other information</b> |       |                                                                                                                                                                                                              |
| Funding                  | 22 ✓  | Give the source of funding and the role of the funders for the present study and, if applicable, for the original study on which the present article is based                                                |

I confirm that the above STROBE guideline recommendations were met.

Peter Bede MD PhD

Trinity College Dublin

22/02/2022
